# Supplementary material for: Superstatistical analysis of sea surface currents in the Gulf of Trieste, measured by HF Radar, and its relation to wind regimes, using the maximum entropy principle
Source: Copernicus journal article supplement (doi:10.5194/npg-2023-9), 2023-04-13
Supplement: Supplementary file 1 [file npg-2023-9-supplement.pdf]

## S1 On the $\Gamma_{n,\lambda}$ distributions from Gaussians with $\sigma \neq 1$

We want to fit the  $\sigma^2 = \frac{1}{\beta}$  distributions as a convolution of exponential distributions. Let's first consider which is the general expression of a  $\Gamma_{n,\lambda}$  coming from gaussian distributions with  $\sigma \neq 1$  in general.

Let  $x_i$  be independent gaussian distributed random variables with zero mean ( $\mu_i = 0$ ) and same variance ( $\sigma_i = \sigma$ ):

$$f(x_i) = \frac{1}{\sqrt{2\pi}\sigma} e^{-\frac{x_i^2}{2\sigma^2}} \quad (\text{S1})$$

Let's define:

$$Q = \sum_{i=1}^{2n} x_i^2 \quad (\text{S2})$$

So, calling  $V$  the elemental shell volume at  $Q(x)$ , which is proportional to the  $(2n - 1)$ -dimensional surface in  $2n$ -space for which  $Q = \sum_{i=1}^{2n} x_i^2$ ,

$$\begin{aligned} P(Q)dQ &= \int_V \frac{e^{-\frac{1}{2\sigma^2}(x_1^2+x_2^2+\dots+x_{2n}^2)}}{(2\pi)^{2n/2}\sigma^{2n}} dx_1 dx_2 \cdots dx_{2n} \\ &= \frac{e^{-\frac{Q}{2\sigma^2}}}{(2\pi)^n \sigma^{2n}} \int_V dx_1 dx_2 \cdots dx_{2n} \\ &= \frac{e^{-\frac{Q}{2\sigma^2}}}{(2\pi)^n \sigma^{2n}} \cdot \frac{2Q^{\frac{2n-1}{2}} \pi^n}{\Gamma(n)} \cdot \frac{dQ}{2Q^{1/2}} \\ &= \frac{Q^{n-1} e^{-\frac{Q}{2\sigma^2}}}{2^n \Gamma(n) \sigma^{2n}} \cdot dQ \end{aligned} \quad (\text{S3})$$

The resulting normalized  $\Gamma_{n,\lambda}$  distribution (where  $\lambda = 1/2\sigma^2$ ) with  $2n$  degrees of freedom (the number of the added gaussian variables) is:

$$\Gamma_{n,\lambda}(Q) = \frac{Q^{n-1} e^{-\frac{Q}{2\sigma^2}}}{(2\sigma^2)^n \Gamma(n)} = \frac{\lambda^n Q^{n-1} e^{-\lambda Q}}{\Gamma(n)} \quad (\text{S4})$$

Imponing  $2n = 2$  we obtain the exponential distribution:

$$\Gamma_{1,\lambda}(Q) = \frac{1}{2\sigma^2} \cdot e^{-\frac{Q}{2\sigma^2}} = \lambda e^{-\lambda Q} \quad (\text{S5})$$

The mean value of a gamma distributed variable is:

$$\mu_{\Gamma,n} = \int_0^{\infty} Q \Gamma_{n,\lambda}(Q) dQ = \frac{n}{\lambda} \quad (\text{S6})$$

The variance of a gamma distributed variable is:

$$\sigma_{\Gamma,n}^2 = \int_0^{\infty} Q^2 \Gamma_{n,\lambda}(Q) dQ - \mu_{\Gamma,n}^2 = \frac{n}{\lambda^2} \quad (\text{S7})$$

Imponing  $n = 1$  (the case of the exponential distribution) we obtain:

$$\sigma_{\text{exp}}^2 := \sigma_{\Gamma,1}^2 = \frac{1}{\lambda^2} \quad (\text{S8})$$

## S2 On the convolution of $\Gamma_{1,\lambda}$ distributions

Let  $X$  and  $Y$  be two independent random variables distributed as  $\Gamma_{1,\lambda}$  and  $\Gamma_{1,k}$  respectively, see Equation (S5), where  $\lambda = \frac{1}{2\sigma_X^2} > 0$  and  $k = \frac{1}{2\sigma_Y^2} > 0$ :

$$\begin{aligned} f_X(x) &= \lambda e^{-\lambda x} \Theta_{(0,\infty)}(x) \\ f_Y(y) &= k e^{-ky} \Theta_{(0,\infty)}(y) \end{aligned} \quad (\text{S9})$$

where

$$\Theta_{(a,b)}(t) = \begin{cases} 1 & \text{if } a \leq t \leq b \\ 0 & \text{otherwise} \end{cases} \quad (\text{S10})$$

The two random variables  $X$  and  $Y$  are independent, so their joint probability distribution is:

$$f_{XY}(x, y) = f_X(x) \cdot f_Y(y) \quad (\text{S11})$$

If we define a new random variable  $Z = X + Y$ , we will obtain:

$$\begin{aligned} f_Z(x, z) &= f_X(x) \cdot f_Y(z - x) \\ &= \lambda k e^{-\lambda x} e^{-k(z-x)} \Theta_{(0,\infty)}(x) \Theta_{(0,\infty)}(z - x) \\ &= \lambda k e^{-kz} e^{-(\lambda-k)x} \Theta_{(0,z)}(x) \end{aligned} \quad (\text{S12})$$

So, we obtain the convolution:

$$\begin{aligned} f_Z(z) &= \int_0^\infty f_Z(x, z) dx \\ &= \lambda k e^{-kz} \int_0^z e^{-(\lambda-k)x} dx \\ &= \frac{\lambda k}{\lambda - k} (e^{-kz} - e^{-\lambda z}) \end{aligned} \quad (\text{S13})$$

The normalization can be easily checked.

### S2.1 The case where $\lambda = k$

In the case where  $\lambda = k$ , it means that  $X$  and  $Y$  are identically distributed, so  $Z$  is the sum of  $n = 2$  exponential processes (positive variables with maximum entropy distribution). We can interpret  $Z$  as the sum of  $2n = 4$  independent gaussian random variables with  $\sigma_X^2 = \frac{1}{2\lambda}$ :

$$Z \sim \Gamma_{2,\lambda}(z) = \lambda^2 z e^{-\lambda z} \quad (\text{S14})$$

In this case the variance results:

$$\sigma_{\Gamma,2}^2 = \frac{2}{\lambda^2} \quad (\text{S15})$$

In the following and in the paper, when we omit the pedix  $n = 2$ , we refer to the case  $n = 2$ :

$$\sigma_{\Gamma}^2 := \sigma_{\Gamma,2}^2 \quad (\text{S16})$$

### S3 The general case: the superstatistical combination of a gaussian distribution and a $\Gamma_{n,\lambda}$ distribution

The PDF of the total signal  $x$  is locally (in time) gaussian  $N_{(0,z)}(x)$  with zero mean and the variance  $z$  varying (on longer time scales) following a  $\Gamma_{n,\lambda}(z)$  distribution. The PDF  $p(x)$  of the total signal can be obtained in the following way (look at integral 16 page 369 of [1]):

$$\begin{aligned}
p(x) &= \int_0^\infty \Gamma_{n,\lambda}(z) \cdot N_{(0,z)}(x) dz \\
&= \int_0^\infty \frac{\lambda^n}{\Gamma(n)} z^{n-1} e^{-\lambda z} \cdot \frac{1}{\sqrt{2\pi}\sqrt{z}} e^{-x^2/2z} dz \\
&= \frac{\lambda^n}{\Gamma(n)\sqrt{2\pi}} \int_0^\infty z^{(n-1)-\frac{1}{2}} \cdot e^{-\lambda z - \frac{x^2}{2z}} dz \\
&= \frac{\lambda^n}{\Gamma(n)\sqrt{2\pi}} (-1)^{n-1} \sqrt{\pi} \frac{\partial^{n-1}}{\partial \lambda^{n-1}} \left( \frac{e^{-\sqrt{2\lambda}x^2}}{\sqrt{\lambda}} \right) \\
&= \frac{(-1)^{n-1} \lambda^n}{\Gamma(n)\sqrt{2}} \cdot \frac{\partial^{n-1}}{\partial \lambda^{n-1}} \left( \frac{e^{-\sqrt{2\lambda}\cdot|x|}}{\sqrt{\lambda}} \right)
\end{aligned} \tag{S17}$$

with zero mean and variance  $s^2$ :

$$\begin{aligned}
s^2 &:= \text{var}(x) = E[x^2] \\
&= 2 \int_0^\infty \frac{(-1)^{n-1} \lambda^n}{\Gamma(n)\sqrt{2}} \cdot x^2 \cdot \frac{\partial^{n-1}}{\partial \lambda^{n-1}} \left( \frac{e^{-\sqrt{2\lambda}x}}{\sqrt{\lambda}} \right) dx \\
&= \frac{(-1)^{n-1} \lambda^n \sqrt{2}}{\Gamma(n)} \cdot \frac{d^{n-1}}{d\lambda^{n-1}} \left( \frac{1}{\sqrt{\lambda}} \int_0^\infty x^2 e^{-\sqrt{2\lambda}x} dx \right) \\
&= \frac{(-1)^{n-1} \lambda^n \sqrt{2}}{\Gamma(n)} \cdot \frac{d^{n-1}}{d\lambda^{n-1}} \left( \frac{1}{\sqrt{\lambda}} \cdot \frac{1}{2\lambda} \cdot \frac{1}{\sqrt{2\lambda}} \underbrace{\int_0^\infty y^2 e^{-y} dy}_{=2} \right) \\
&= \frac{(-1)^{n-1} \lambda^n}{\Gamma(n)} \cdot \frac{d^{n-1}}{d\lambda^{n-1}} \left( \frac{1}{\lambda^2} \right) \\
&= \frac{(-1)^{n-1} \lambda^n}{\Gamma(n)} \cdot \frac{(-1)^{n-1} n!}{\lambda^{n+1}} \\
&= \frac{n}{\lambda}
\end{aligned} \tag{S18}$$

The normalization of  $p(x)$  can be easily checked.

We note that:

$$s^2 = \frac{n}{\lambda} = \sqrt{n} \cdot \sigma_{\Gamma,n} = n \cdot \sigma_{\text{exp}} \tag{S19}$$

## S4 Our case

In our case:

$$\sigma_*^2 \sim f(\sigma_*^2) = \Gamma_{2,\lambda_*}(\sigma_*^2) = \lambda_*^2 \sigma_*^2 e^{-\lambda_* \sigma_*^2} \quad (\text{S20})$$

Since our focus is on the variances (positive values), we can interpret  $n = 2$  as the effective degree of freedom.

The velocity increment PDF is (see Eq. (S17) with  $n = 2$ ):

$$\begin{aligned} p(\delta u) &= \int_0^\infty f(\sigma_{\delta u}^2) p(\delta u | \sigma_{\delta u}^2) d(\sigma_{\delta u}^2) \\ &= \int_0^\infty \lambda_{\delta u}^2 \sigma_{\delta u}^2 e^{-\lambda_{\delta u} \sigma_{\delta u}^2} \cdot \frac{1}{\sqrt{2\pi}} \frac{1}{\sqrt{\sigma_{\delta u}^2}} e^{-\delta u^2 / 2\sigma_{\delta u}^2} \cdot d(\sigma_{\delta u}^2) \\ &= -\frac{\lambda_{\delta u}^2}{\sqrt{2}} \cdot \frac{\partial}{\partial \lambda_{\delta u}} \left( \frac{e^{-\sqrt{2\lambda_{\delta u}} |\delta u|}}{\sqrt{\lambda_{\delta u}}} \right) \\ &= \frac{\sqrt{2\lambda_{\delta u}} e^{-\sqrt{2\lambda_{\delta u}} |\delta u|} (\sqrt{2\lambda_{\delta u}} |\delta u| + 1)}{4} \end{aligned} \quad (\text{S21})$$

and analogously for  $\delta v$ . The normalization can be easily checked. The PDF is symmetric.

The analytical velocity increment variance  $s_*^2$  is (see Eq. (S18) with  $n = 2$ ):

$$s_{\delta u}^2 = \int_{-\infty}^{+\infty} \delta u^2 p(\delta u) d(\delta u) = \frac{2}{\lambda_{\delta u}} \quad (\text{S22})$$

and analogously for  $\delta v$ .

In the case  $n = 2$ , Eq. (S19) reduces to:

$$\left. \begin{aligned} \sigma_{\text{exp}}^2 &= \frac{1}{\lambda_*^2} \\ \sigma_\Gamma^2 &= \frac{2}{\lambda_*^2} \end{aligned} \right\} s_*^2 = \frac{2}{\lambda_*} = \sqrt{2} \cdot \sigma_\Gamma = 2 \cdot \sigma_{\text{exp}}. \quad (\text{S23})$$

## References

- [1] Gradshteyn, Izrail Solomonovich, and Iosif Moiseevich Ryzhik. Table of integrals, series, and products. Academic press, 2014.
